# Supplementary material
Source: PubMed Central journal article supplement (PMC5711556)
Supplement: NIHMS894394-supplement-1.pdf [file NIHMS894394-supplement-1.pdf]

**Ligand-mediated cytoplasmic retention of the Ah receptor inhibits  
macrophage mediated acute inflammatory responses**

Gulsum E. Muku, Tejas S. Lahoti, Iain A. Murray, Michael A. Podolsky, Kayla  
Smith, Troy D. Hubbard, Guray Kuzu, Krishne Gowda, Shantu G. Amin, and  
Gary H. Perdew

**Table S1. Primers for real-time PCR**

| Primer name   | Primer sequence                                                      |
|---------------|----------------------------------------------------------------------|
| <i>Ahrr</i>   | 5 '-CAGAAGCGGAGGCTTACCAT-3 '<br>5 '-CTCTGTATTGAGGCGGTCCC-3 '         |
| <i>Ccl3</i>   | 5 '-TACAAGCAGCAGCGAGTACC-3 '<br>5 '-TCAGGAAAATGACACCTGGCT-3 '        |
| <i>Ccl4</i>   | 5 '-CAAGCCAGCTGTGGTATTCCT-3 '<br>5 '-AGCAAGGACGCTTCTCAGTG-3 '        |
| <i>Cxcl1</i>  | 5 '-GCTGGGATTCACCTCAAGAA-3 '<br>5 '-TCTCCGTTACTTGGGGACAC-3 '         |
| <i>Cxcl2</i>  | 5 '-AGACAGAAGTCATAGCCACTCTCAAG-3 '<br>5 '-CCTCCTTTCCAGGTCAGTTAGC-3 ' |
| <i>Cyp1a1</i> | 5 '-CTCTTCCCTGGATGCCTTCAA-3 '<br>5 '-GGATGTGGCCCTTCTCAAATG-3 '       |
| <i>Cyp1b1</i> | 5 '-GCTAGCCAGCAGTGTGATGATATT-3 '<br>5 '-GGTTAGCCTTGAAATTGCACTGAT-3 ' |
| <i>Gapdh</i>  | 5 '-AAGAGGGATGCTGCCCTTAC-3 '<br>5 '-CGGGACGAGGAAACACTCTC-3 '         |
| <i>Ier3</i>   | 5 '-AAGATGATGGCGAACAGGAG-3 '<br>5 '-GAAGGGTGTCTTACCCTCG-3 '          |
| <i>Il1a</i>   | 5 '-CCAGAAGAAAATGAGGTCGG-3 '<br>5 '-AGCGCTCAAGGAGAAGACC-3 '          |
| <i>Il1b</i>   | 5 '-AGCTTCCTTGTGCAAGTGTCT-3 '<br>5 '-GACAGCCCAGGTCAAAGGTT-3 '        |
| <i>Il6</i>    | 5 '-ATCCAGTTGCCTTCTTGGGACTGA-3 '<br>5 '-TAAGCCTCCGACTTGTGAAGTGGT-3 ' |
| <i>Mrc1</i>   | 5 '-AGGGACCTGGATGGATGACA-3 '<br>5 '-AGGGAAGGGTCAGTCTGTGT-3 '         |
| <i>Ptgs2</i>  | 5 '-CTGACCCCCAAGGCTCAAAT-3 '<br>5 '-ACCTCTCCACCAATGACCTGA-3 '        |
| <i>Rpl13a</i> | 5 '-TTCGGCTGAAGCCTACCAGAAAGT-3 '<br>5 '-GCATCTTGGCCTTTTTCCGTT-3 '    |
| <i>Tnfa</i>   | 5 '-GGTGCCTATGTCTCAGCCTCTT-3 '<br>5 '-GCCATAGAAGTATGAGAGGGGAG-3 '    |

**Table S2. Primers for CHIP-qPCR**

| Primer name  | Primer sequence                                              |
|--------------|--------------------------------------------------------------|
| <i>Ptgs2</i> | 5 '-CGTCTCTCATTTGCGTGGGTA-3 '<br>5 '-CCGCTTAGGCTTTCCCCAA-3 ' |

**Table S3. Alignment scores**

|                     | Veh1     | Veh2     | LPS1     | LPS2     | LPS_SGA1 | LPS_SGA2 |
|---------------------|----------|----------|----------|----------|----------|----------|
| input               | 37377503 | 31428251 | 29347575 | 29089028 | 30436943 | 27496891 |
| mapped              | 14226751 | 14516693 | 12737106 | 15746862 | 13255485 | 15107846 |
| multiple alignments | 293414   | 240890   | 261413   | 335952   | 257224   | 305645   |

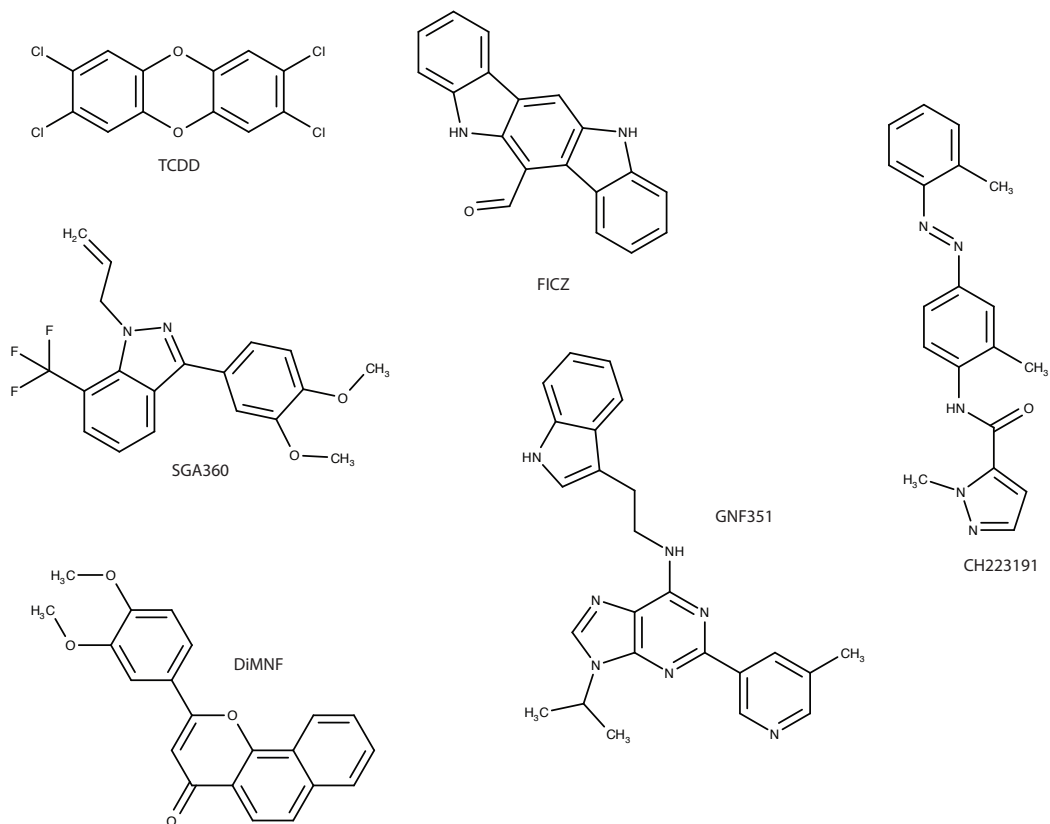

### Supplemental Figure 1.

**Structures of AHR ligands.** TCDD and FICZ are agonists; SGA360 and DiMNF are selective Ah receptor modulators and GNF351 and CH223191 are antagonists.

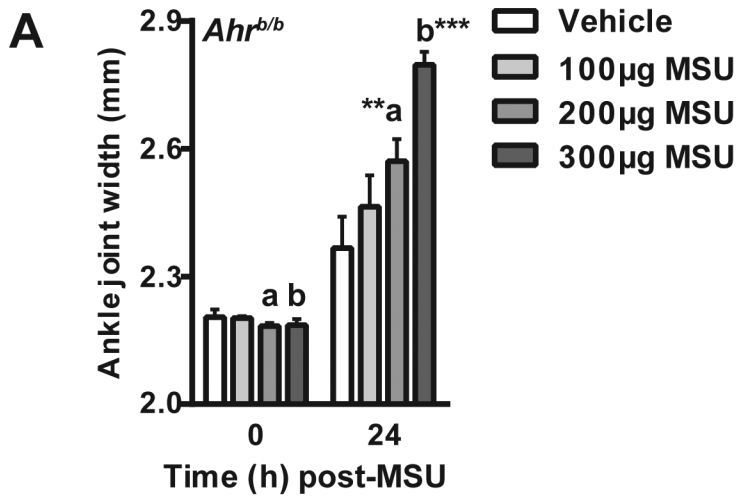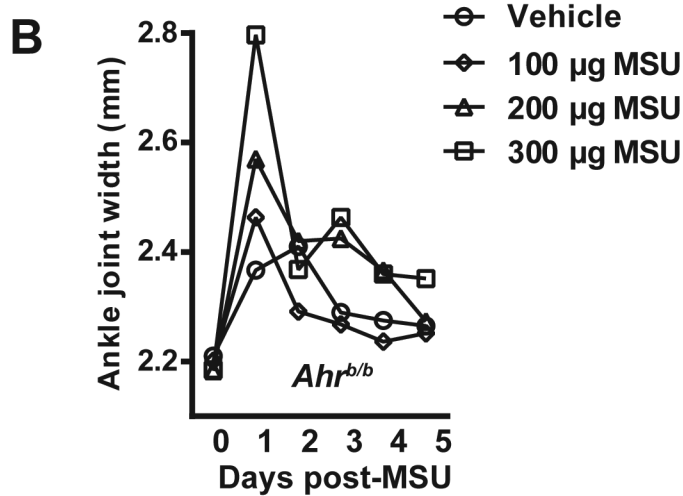

**Supplemental Figure 2.**

**The introduction of monosodium urate crystals into an angle joint induces a dose-dependent increase in joint thickness.** A, Wild-type C57BL6/J mice were administered 10 µl PBS or the indicated amount of MSU suspension through injection into the articular space of the ankle joint. Joint edema was assessed 24 h post injection through micrometry. Data represent mean joint width (mm) ± SEM. B, Wild-type C57BL6/J mice were administered 10 µl PBS or the indicated amount of MSU suspension through injection into the articular space of the ankle joint. Joint edema was assessed at 24 h intervals post injection through micrometry. Data represent mean joint width (mm) ± SEM.

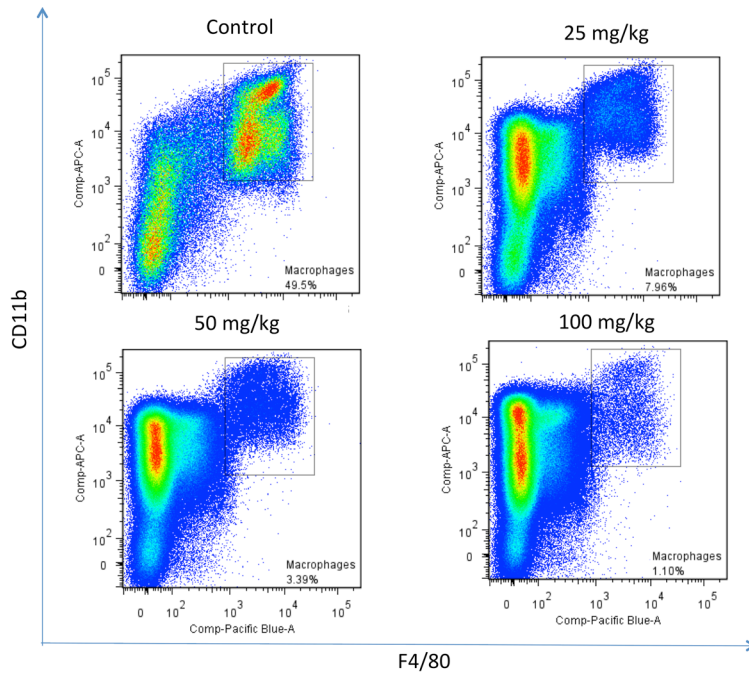

### Supplemental Figure 3.

**Peritoneal exposure to MSU crystals leads to a dramatic decrease in macrophages in peritoneal wash in a dose dependent manner.** C57BL6/J mice were IP injected with MSU crystals after 6 h lavage fluid collected and cells subjected in flow analysis as outlined in methods section.

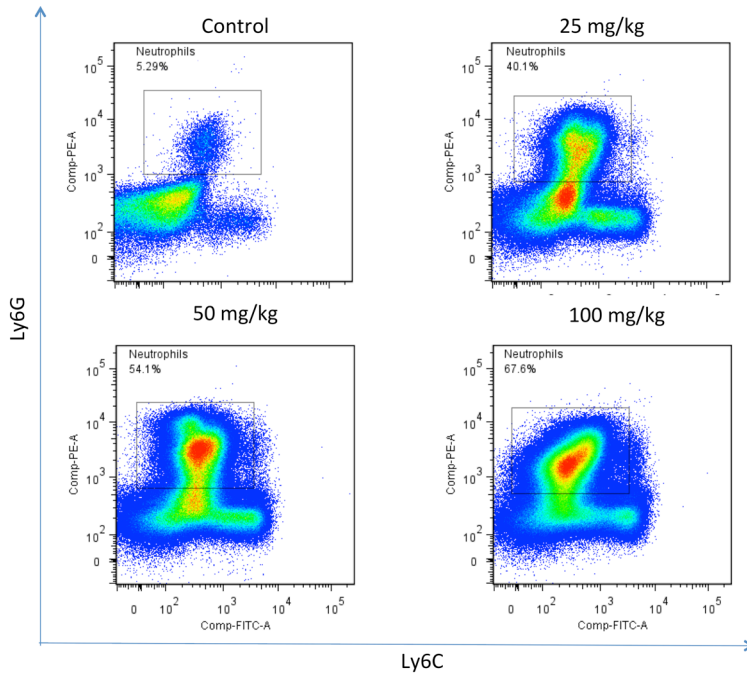

**Supplemental Figure 4.**

**Peritoneal exposure to MSU crystals leads to a dramatic increase in neutrophils in peritoneal wash in a dose-dependent manner.** C57BL6/J mice were IP injected with MSU crystals after 24 h lavage fluid was collected and subjected in flow analysis as outlined in methods section.

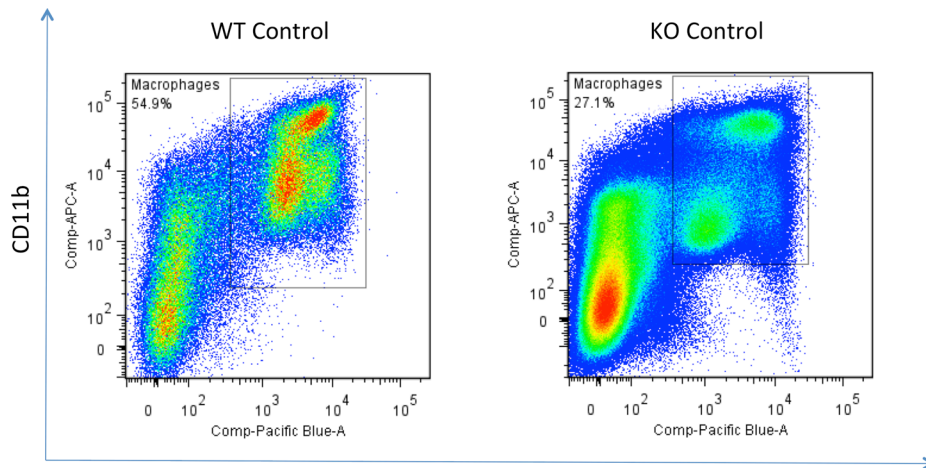

**Supplemental Figure 5.**

**Lack of AHR expression in mice leads to a greatly reduced resident peritoneal macrophage population.** Peritoneal lavage fluid from C57BL6/J and *Ahr*<sup>-/-</sup> mice were subjected in flow analysis as outlined in methods section.

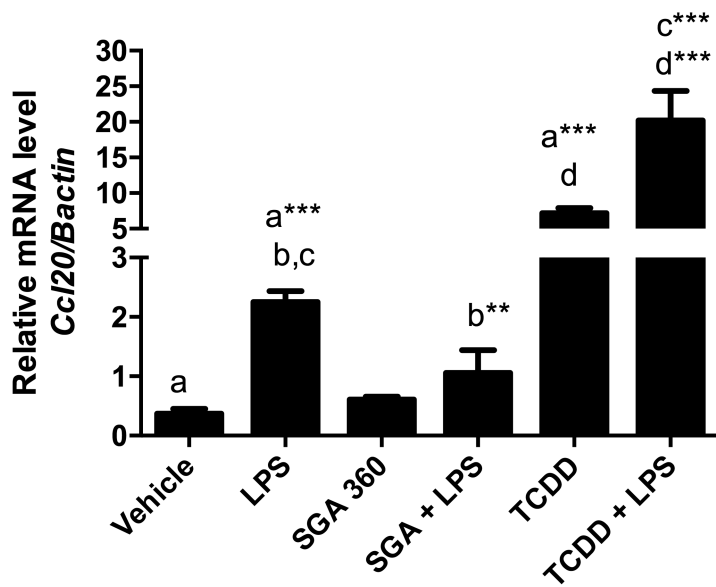

**Supplemental Figure 6.**

**SGA360 represses and TCDD induces *Cc/20* expression in the presence of LPS.** Primary peritoneal macrophage cultures were pre-treated for 1 h with AHR ligands prior to exposure to LPS for 5 h. RNA was isolated and qRT-PCR performed and *Cc/20* expression was normalized to *Bactin*.



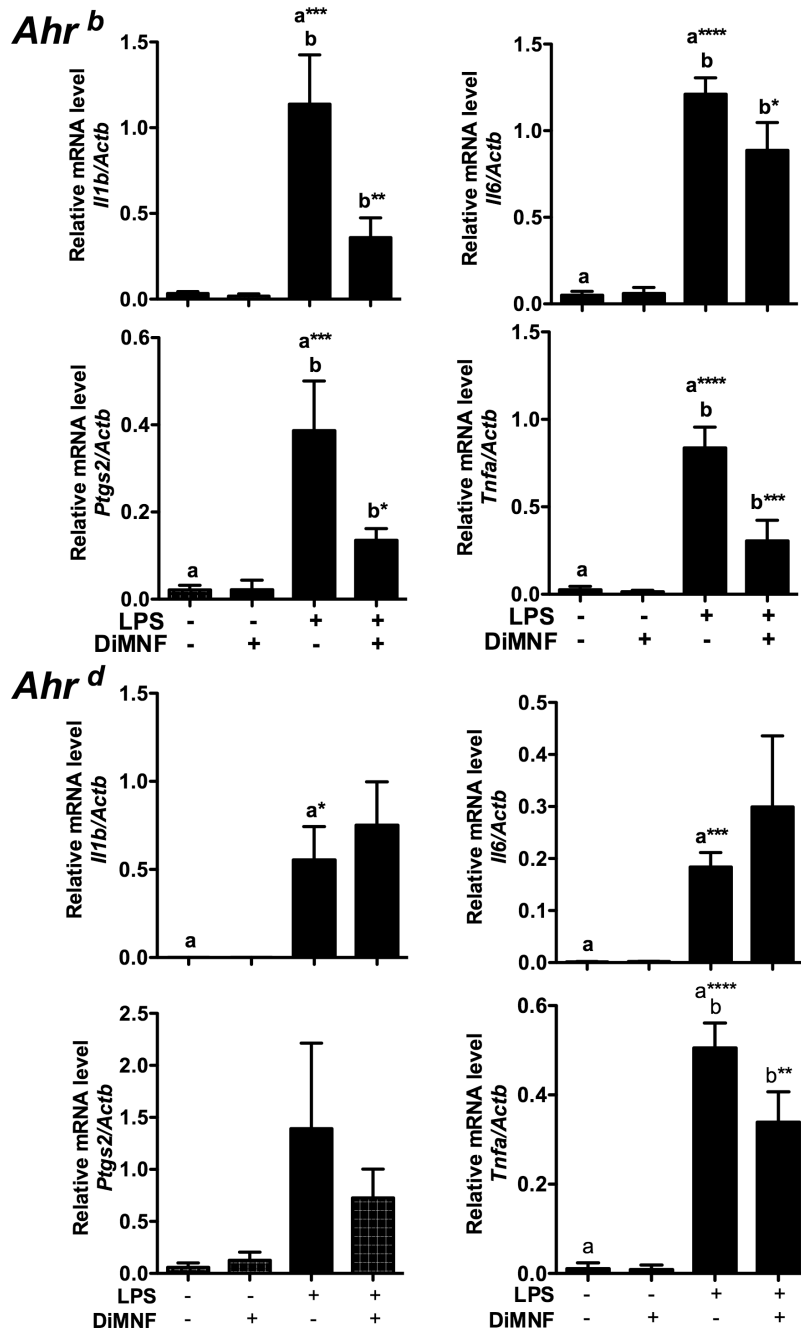

**Supplemental Figure 7.**

**DiMNF attenuates inflammatory signaling in primary macrophages from C57BL6/J-Ah<sup>b</sup> but not in C57BL6/J-Ah<sup>d</sup> mice.** Primary peritoneal macrophages cultures were treated with DiMNF as indicated, after 1 h cells were treated with LPS or phosphate buffered saline for 4 h. Total RNA was isolated and the relative mRNA levels of *Ptgs2*, *Il1b*, *Il6*, and *Tnfa* were assessed through qRT-PCR. The data represents mean mRNA level normalized to *Actb* mRNA expression  $\pm$  SD. (n=3/treatment group; \*P<0.05, \*\*P<0.01, \*\*\*P<0.001).

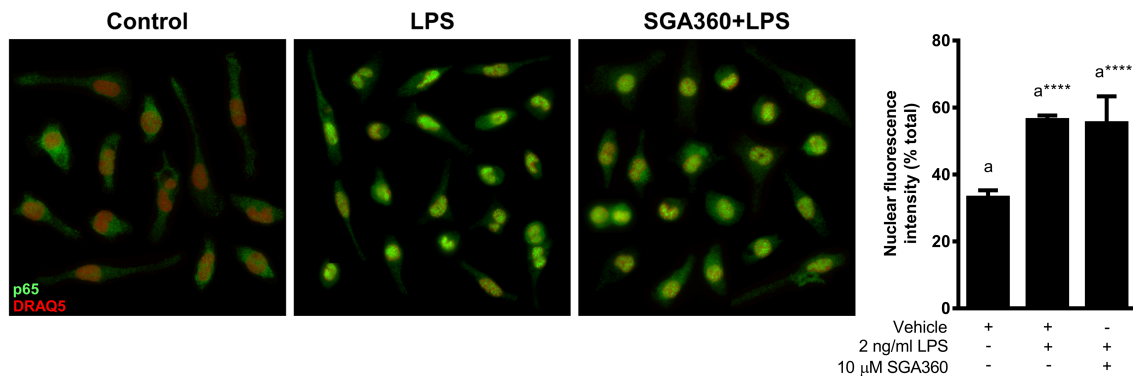

**Supplemental figure 8.**

**SGA360 does not inhibit LPS-mediated p65 translation into the nucleus.** Primary macrophages cultures were pre-treated with SGA360 for 1 h prior to exposure to LPS, after an additional 1 h cells were fixed; the presence of p65 visualized by indirect immunofluorescent and confocal microscopy. Cells were counterstained with DRAQ5 to visualized nuclei.

## METHODS

### Indirect immunocytochemistry

Immunolocalization of p65 was performed as described previously [1]. Briefly, cells were blocked with 10% normal goat serum in PBS, incubated with anti-p65 primary antibody (Cell Signaling Technology, Danvers, MA), and secondary antibody, Alexa Fluor® 488 Conjugate anti-rabbit IgG (Cell Signaling Technology, Danvers, MA). Nuclei were counterstained with DRAQ5 (Cell Signaling Technology, Danvers, MA) before mounting with ProLong® Gold Antifade Reagent (Cell Signaling Technology, Danvers, MA). Cells were visualized using a Keyence All-in-One Fluorescence Microscope BZ-9000 Generation II.

1. Lahoti TS et al. Aryl hydrocarbon receptor activation synergistically induces lipopolysaccharide-mediated expression of proinflammatory chemokine (c-c motif) ligand 20. *Toxicol. Sci.* 2015; 148:229-40.
